RESEARCH ARTICLE

# The population impact of obesity, sedentary lifestyle, and tobacco and alcohol consumption on the prevalence of type 2 diabetes: Analysis of a health population survey in Chile, 2010

María P. Bertoglia<sup>1</sup>, Juan G. Gormaz<sup>2</sup>, Matías Libuy<sup>1</sup>, Dérgica Sanhueza<sup>1</sup>, Abraham Gajardo<sup>1</sup>, Andrea Srur<sup>3</sup>, Magdalena Wallbaum<sup>3</sup>, Marcia Erazo<sup>1\*</sup>

**1** Public Health Nutrition Program, School of Public Health, University of Chile, Santiago, Chile, **2** Molecular and Clinical Pharmacology Program, Bio-Medical Sciences Institute, University of Chile, Santiago, Chile, **3** Noncommunicable Diseases Department. Ministry of Health, Santiago, Chile

\* [merazo@med.uchile.cl](mailto:merazo@med.uchile.cl)

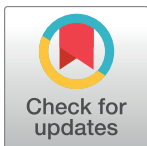

**OPEN ACCESS**

**Citation:** Bertoglia MP, Gormaz JG, Libuy M, Sanhueza D, Gajardo A, Srur A, et al. (2017) The population impact of obesity, sedentary lifestyle, and tobacco and alcohol consumption on the prevalence of type 2 diabetes: Analysis of a health population survey in Chile, 2010. *PLoS ONE* 12(5): e0178092. <https://doi.org/10.1371/journal.pone.0178092>

**Editor:** Fernando Guerrero-Romero, Mexican Social Security Institute, MEXICO

**Received:** November 9, 2016

**Accepted:** May 7, 2017

**Published:** May 25, 2017

**Copyright:** © 2017 Bertoglia et al. This is an open access article distributed under the terms of the [Creative Commons Attribution License](https://creativecommons.org/licenses/by/4.0/), which permits unrestricted use, distribution, and reproduction in any medium, provided the original author and source are credited.

**Data Availability Statement:** Data are available at doi:[10.5061/dryad.k3q89](https://doi.org/10.5061/dryad.k3q89).

**Funding:** The authors received no specific funding for this work.

**Competing interests:** The authors have declared that no competing interests exist.

## Abstract

### Aim

To estimate the impact of tobacco use, sedentary lifestyle, obesity and alcohol consumption on type 2 diabetes mellitus (T2DM) prevalence in the Chilean population.

### Methods

The study included 5,293 subjects with fasting glycaemia levels from the nationwide cross-sectional health survey in 2010, commissioned by the Ministry of Health, Chile. Crude and Adjusted Odds Ratio to T2DM and its corresponding 95% confidence interval were estimated through logistic regressions. Attributable fractions and population attributable fractions were estimated.

### Results

T2DM prevalence was 9.5%. Sedentary lifestyles and obesity were significant risk factors for T2DM. 52,4% of T2DM could be avoided if these individuals were not obese, and at a population level, 23% of T2DM could be preventable if obesity did not exist. A 64% of T2DM is explained by sedentariness, and if people would become active, a 62,2% of the cases of diabetes could be avoided.

### Interpretation

About 79% of T2DM cases in Chile could be prevented with cost-effective strategies focused on preventing sedentary lifestyle and obesity. It's therefore urgent to implement

evidence-based public health policies, aimed to decrease the prevalence of T2DM, by controlling its risk factors and consequently, reducing the complications from T2DM.

## Introduction

Noncommunicable diseases are the principal cause of mortality worldwide. Diabetes by itself represents 4% of deaths, and has been identified as the leading cause of disability[1]. Recently, it was estimated that about 347 million adults have diabetes worldwide, a condition that is rising in different regions of the world, being led by Asia and Africa[2].

The World Health Organization has declared that unhealthy diets, sedentary lifestyles, tobacco and excessive alcohol consumption are the major risk factors for type 2 diabetes mellitus (T2DM)[1].

Obesity increases the prevalence of diabetes, presenting a dose-response relationship with Body Mass Index with no sex difference[3]. Physical inactivity is another main risk factor for T2DM, causing 7% of the burden of disease from T2DM worldwide[4]. Alcohol consumption exhibits a U-shaped relationship with the risk of T2DM in both males and females, with two drinks per day (~50g/day) increasing the Relative Risks (RR)[5]. Recently, tobacco consumption has been pointed out as having a causal association with T2DM. A recent meta-analysis that included 21 cohort studies reinforced that smoking is an independent risk factor for T2DM. The pooled relative risk (RR) is 1.44 (95% CI = 1.31 to 1.58), showing that there's a dose-response relationship[6]. Also, among the key conclusions of the 2014 Surgeon General's report, research continues to identify new diseases caused by smoking, including T2DM [7].

In Chile, T2DM has increased over the last years. In year 2015, diabetes national prevalence in subjects aged 20 to 79 was 11% [uncertainty range 9.3–13.6%], which translates in a total of 1,37 [1,16–1,69] million people living with diabetes.

This locates Chile among the top 5 countries with the highest prevalence of T2DM within the Central and South American Region[8].

In order to implement public policies that reflect the epidemiology of this disease, it's necessary to estimate the risks and the population impact of these four behavioral risk factors (tobacco use, sedentary lifestyles, obesity and excessive alcohol consumption) on T2DM prevalence. Thus, the aim of this study is to estimate the impact of these four risk factors in the Chilean population and their prevalence in patients suffering T2DM. For these analyses, the 2009–2010 National Health Survey data will be used (prevalence, measure of association and burden of disease).

## Materials and methods

### Study design

The Chilean Ministry of Health (MINSAL) has conducted two nationwide cross-sectional Health Surveys (NHS). The first NHS was completed in 2003, and included the screening of people 17 years and older. These people were recruited by using a stratified random sample representing the adult population, considering their socioeconomic status, urban/rural residence and educational level[9].

The survey conducted during 2009–2010 was designed to follow up some of the health problems included in the NHS 2003, but also incorporated new diseases, conditions or chronic health problems, risk factors and issues related to perceived health status in the sampled population. A total of 13 conditions previously evaluated in 2003 (high blood pressure, dyslipidaemia,

nutritional status, diabetes mellitus, smoking, metabolic syndrome, cardiovascular risk, sedentary lifestyles, musculoskeletal symptoms, renal function, chronic respiratory symptoms, cognitive impairment of the elderly and B and C hepatitis virus) were also evaluated in 2010[10]. This second Health Survey used a complex sampling representative of the Chilean population (15 years and older) and is the data used in this publication to measure population impact. (<http://epi.minsal.cl/bases-de-datos/>)

## Sampling and sample size

A total of 5,293 individuals were included in the analysis with more than 8 hours of fasting to measure their glycemia levels.

The sampling frame was build from the 2002 Population and Housing Census. This cross-sectional study used a complex sample design (multistage stratified cluster sample of households) with national, regional and rural/urban area representation. The target population was adults aged older than or equal to 15 years old. The survey had a response rate of 85%, the rejection rate was 12% (n 391), and 632 subjects were excluded because physical examination was not performed. Thus, 5,293 individuals were finally interviewed. Nurses performed clinical measurements and tests to 5,043 participants and 4,956 people accepted laboratory tests (blood and urine samples). The sample loss was 28% and included refusal, inability to contact and other random loss.

The sample was designed with over-representation of the elderly and people living in areas other than the Metropolitan Region (capital region), including individuals living in rural areas, in order to increase the sample design efficiency and homogenizing the precision of the estimators.

Pregnant women and persons with violent behaviour were excluded from the random selection.

## Laboratory analysis

Specialists from the 'Catholic University of Chile' conducted all laboratory analysis and interpretation of clinical tests. Once the survey was finished, the test results were sent to each participant, along with health recommendations according to their results. In addition, local epidemiologists provided information to each participant according to their risk level. The survey incorporated quality control processes at different stages, including a National Training Program for interviewers, an interviewer manual and the use of electronic devices to obtain automated information. These provided an interim standardization in addition to high quality laboratory analysis techniques to ensure essential methodological survey procedures.

## Data processing and statistical analysis

The Ministry of Health provided a complete database with the cases and variables incorporated in the survey. Data consistency was reviewed through the analysis of determined variables distribution.

Shapiro-Wilk test was used to determine if the variables presented Gaussian distribution. Statistical tests used to evaluate differences among groups depended on the variable distribution (parametric and nonparametric tests).

Accordingly to the health-related definitions used by the National Health Survey, the variables incorporated in this article are:

- T2DM (if any of these two criteria were met, a respondent was deemed to have T2DM):
  - T2DM self-report (not during pregnancy).

- Fasting glycaemia  $\geq 126$  mg/dL.
- Smoking status (self-reported):
  - non-smoker (never smoked),
  - former smoker ( $\geq 6$  months of quitting tobacco)
  - and current smoker (daily and occasional smoker, and  $< 6$  months of quitting tobacco smoke).
- Obesity: Individuals with a Body Mass Index  $\geq 30$  Kg/M<sup>2</sup>.
- Excessive alcohol consumption: Determined by using the Abnormal Alcohol Consumption Scale  $\geq 2$  points[11]. This Scale has been validated in Chile and it's widely used in the country (this cutting point is referred to abnormal alcohol consumption at some time in life)[10].
- Sedentary lifestyle: Less than 30 minutes of physical activity, a minimum of 3 times a week.

Crude and Adjusted (for the risk factors sedentary lifestyle, obesity and alcohol consumption) Odds Ratio to T2DM and its corresponding 95% confidence interval (95% CI) were estimated through logistic regressions. Attributable fractions (AF) are interpreted as the proportion of disease risk that could be prevented if the exposure was eliminated. This has a practical value in public health prevention policies, especially when the exposure is modifiable[12]. It was calculated using the following formula:  $AF = P(D) - (D|\bar{E})/P(D)$ , where  $P(D)$  is the probability of disease, and  $P(D|\bar{E})$  is the probability of disease not exposed to the risk factor under evaluation. Population attributable fractions (PAF) are calculated using Levin's formula[13].

It's important to acknowledge some considerations about the use of these risk measures in cross-sectional studies. In first place, the risk measure is calculated from the odds ratio rather than from the risk ratio[14]. Also, as the analysis rely on prevalence data to study the association between disease and a risk factor, the following minimal assumptions are fulfilled[15]: T2DM does not lead to a change in smoking habits; smoking is not a prognostic factor of the outcome (T2DM duration is independent of the smoking status); and smoking status information is relevant for the T2DM (adequate time frame).

The analysis was performed using STATA Software, version 12[16].

## Ethical aspects

The Catholic University of Chile School of Medicine Research Ethics Committee granted its ethical approval. Patients were invited to participate in the study. Before their incorporation, the objectives of the study, measurements and risks were informed to each patient, if they agreed with the protocol, an informed consent were signed for each participant.

## Results

The population's characteristics are shown in [Table 1](#).

The risk factors for T2DM included in this study were identified as obesity 29.1%, sedentary lifestyle 91.66%, lifetime smokers 40%, former smokers 19.36%, and excessive alcohol consumption (problem drinker) 14.72%.

When OR were estimated, sedentary lifestyle, obesity and alcohol consumption became significant in crude analysis, and when adjusted, only obesity and sedentary lifestyle remained significant ([Table 2](#)).

When stratified by sex, in crude analysis, the four factors were significant for men (alcohol is a protective factor however), and when adjusted; only obesity, sedentary lifestyle and former

**Table 1. NH survey of population characteristics.**

| Characteristic                           | 2010                |                     |                       |
|------------------------------------------|---------------------|---------------------|-----------------------|
|                                          | Total<br>(n = 5293) | Males<br>(n = 2150) | Females<br>(n = 3143) |
| Age (Mean ± SD)                          | 46.37 ± 18.68       | 45.62 ± 18.55       | 46.87 ± 18.75         |
| Education (%)                            |                     |                     |                       |
| < 8 years                                | 26.70               | 24.44               | 28.25                 |
| 8–12 years                               | 54.67               | 56.48               | 53.44                 |
| > 12 years                               | 18.62               | 19.08               | 18.31                 |
| Diabetes Mellitus %                      | 9.5                 | 8.4                 | 10.4                  |
| Alcohol intake (%) (Problem Drinker)     | 14.72               | 27.62               | 6.04                  |
| Sedentary lifestyle (%)                  | 91.66               | 88.11               | 94.09                 |
| Obesity (BMI ≥30 Kg/m <sup>2</sup> ) (%) | 29.1                | 23.36               | 32.97                 |
| Smoking (%)                              |                     |                     |                       |
| Current                                  | 40                  | 39.28               | 33                    |
| Former (>6 months)                       | 19.36               | 23.88               | 16.29                 |

<https://doi.org/10.1371/journal.pone.0178092.t001>

smoker remained as significant risk factors while alcohol consumption was not statistically significant. For women, only obesity and sedentary lifestyle were significant and when adjusted, only obesity remained as a risk factor for T2DM (Table 2).

When attributable fractions were estimated, sedentary lifestyle was the main risk factor that explains T2DM with an overall value of 55–58, followed by obesity (with values ranged between 52 and 55), and former smokers (between 12 and 38).

When stratified by sex, in males, the principal risk factor is sedentary lifestyle (61.54) compared to women, to whom obesity is the main risk factor explaining T2DM (57.45). Being a former smoker is significant in men (Table 3).

Finally, when the impact of these risk factors on the population is considered, about 82% of the T2DM prevalence rate in the country is explained by sedentary lifestyle, obesity and tobacco. The major impact is given by sedentary lifestyle, explaining ~54% of T2DM at a national level, being more important in men than in women (~59 vs. ~45, respectively), followed by obesity with ~25% of the cases in the country (~30% in women and ~18% in men). Being a former smoker (~3% overall) was found to be only significant in men (~15%). All of these figures are displayed in Table 4.

**Table 2. Crude and adjusted odds ratios and 95% confidence interval for tobacco, obesity, sedentary lifestyle, excessive alcohol consumption and diabetes mellitus.**

| Exposure                  | Total                |                      | Males                |                      | Females              |                      |
|---------------------------|----------------------|----------------------|----------------------|----------------------|----------------------|----------------------|
|                           | 2010<br>(n = 5293)   |                      | 2010<br>(n = 2150)   |                      | 2010<br>(n = 3143)   |                      |
|                           | Crude                | Adjusted*            | Crude                | Adjusted*            | Crude                | Adjusted*            |
| Obesity                   | 2.37<br>(1.97–2.85)  | 2.20<br>(1.82–2.66)  | 2.18<br>(1.60–2.96)  | 1.93<br>(1.40–2.66)  | 2.48<br>(1.96–3.13)  | 2.35<br>(1.85–2.99)  |
| Sedentary                 | 2.890<br>(1.81–4.61) | 2.248<br>(1.38–3.65) | 3.272<br>(1.65–6.46) | 2.604<br>(1.30–5.19) | 2.405<br>(1.25–4.59) | 1.878<br>(0.94–3.74) |
| Alcohol consumption       | 0.67<br>(0.50–0.88)  | 0.84<br>(0.62–1.14)  | 0.65<br>(0.45–0.93)  | 0.80<br>(0.55–1.18)  | 0.78<br>(0.47–1.31)  | 0.91<br>(0.52–1.59)  |
| Former smoker (>6 months) | 1.16<br>(0.93–1.44)  | 1.14<br>(0.90–1.44)  | 1.71<br>(1.21–2.41)  | 1.57<br>(1.10–2.26)  | 0.90<br>(0.66–1.22)  | 0.86<br>(0.62–1.19)  |

\*Adjusted for the other risk factors.

<https://doi.org/10.1371/journal.pone.0178092.t002>

**Table 3. Adjusted attributable fractions (AF), population attributable fractions (PAF) and 95% confidence interval for tobacco, obesity, sedentary lifestyle, excessive alcohol consumption and diabetes mellitus.**

| Exposure                  | Estimator | Total                        | Males                        | Females                      |
|---------------------------|-----------|------------------------------|------------------------------|------------------------------|
|                           |           | 2010                         | 2010                         | 2010                         |
| Obesity                   | AF        | 54.55<br>(53.65 to 55.44)    | 48.19<br>(47.08 to 49.30)    | 57.45<br>(56.41 to 58.48)    |
|                           | PAF       | 25.26<br>(18.72 to 31.27)    | 18.26<br>(8.16 to 27.25)     | 29.52<br>(20.81 to 37.28)    |
| Sedentary                 | AF        | 55.36<br>(53.90 to 56.81)    | 61.54<br>(59.66 to 64.46)    | 46.52<br>(44.93 to 48.12)    |
|                           | PAF       | 53.55<br>(26.0 to 70.84)     | 58.69<br>(20.47 to 78.54)    | 45.44<br>(-6.1 to 71.93)     |
| Alcohol consumption       | AF        | -19.05<br>(-19.75 to -18.34) | -23.46<br>(-24.24 to -22.67) | -8.70<br>(-9.68 to -7.72)    |
|                           | PAF       | -1.98<br>(-5.44 to 1.35)     | -4.96<br>(-13.96 to 3.32)    | -0.43<br>(-3.06 to 2.12)     |
| Former smoker (>6 months) | AF        | 12.28<br>(11.55 to 13.01)    | 36.31<br>(35.25 to 37.36)    | -16.28<br>(-17.01 to -15.55) |
|                           | PAF       | 3.28<br>(-2.6 to 8.84)       | 14.85<br>(2.57 to 25.58)     | -2.77<br>(-9.02 to 3.11)     |

<https://doi.org/10.1371/journal.pone.0178092.t003>

**Table 4. Population impact of sedentary lifestyle, obesity and tobacco on diabetes mellitus prevalence.**

| Population | Total †  | T2DM Prevalence | Population with T2DM | PAF to obesity | PAF to sedentary lifestyle | PAF to smoking (former > 6 months) | Population with T2DM attributable to obesity | Population with T2DM attributable to sedentary lifestyle | Population with T2DM attributable to tobacco | Total   |
|------------|----------|-----------------|----------------------|----------------|----------------------------|------------------------------------|----------------------------------------------|----------------------------------------------------------|----------------------------------------------|---------|
| Men        | 7668740  | 8.4             | 644174               | 18.26          | 58.69                      | 14.85                              | 117626                                       | 378065                                                   | 95660                                        | 591351  |
| Women      | 7447695  | 10.4            | 774560               | 29.52          | 45.44 **                   | -2.77 **                           | 228650                                       | 351960                                                   | -21455                                       | 559155  |
| Total      | 15116435 | 9.5             | 1436061              | 25.26          | 53.55                      | 3.28 **                            | 362749                                       | 769011                                                   | 47103                                        | 1178863 |

† National Census 2002

\*\*Not significant

<https://doi.org/10.1371/journal.pone.0178092.t004>

## Discussion

This article illustrates that three of the four risk factors considered in the analysis have an impact on the prevalence of type 2 diabetes mellitus. They are: sedentary lifestyle, obesity and tobacco consumption (tobacco demonstrated to be a risk factor only in men). Physical inactivity and obesity have the highest population impact on this disease.

## Similar studies

Similar studies using the same methods to evaluate the association between risk factors and diabetes found no significant evidence of alcohol being one of the risk factors for type 2 diabetes, furthermore, moderate alcohol consumption has been described as protective for T2DM [5]. The proposed explanation of this protection is that moderate alcohol consumption protects cardiovascular health, especially in men when consuming 22g/per day of alcohol (RR 0.87 CI 0.76 to 1.00). Meanwhile in women, consumption of 24 g/per day of alcohol is even more protective (0.60 CI 0.52 to 0.69), when compared to lifetime abstainers[5].

Based on an analysis of BMI and overall mortality, a collaborative study notes that, in both male and female, mortality was lower at a BMI between 22.5–25 kg/m<sup>2</sup>[3]. Above this range,

positive associations for different specific causes of mortality were recorded. The absolute excess risk attributable to BMI and smoking is additive, i.e., for each increment of 5 kg/m<sup>2</sup> units of BMI there is an average increase of 30% in overall mortality (hazard ratio per 5 kg/m<sup>2</sup>: 1.29 (95% CI 1.27 to 1.32)), 40% for cardiovascular related mortality (HR 1.41 CI 1.37 to 1.45), 60–120% for diabetic cause of mortality (HRs 2.16 CI 1.89–2.46), kidney (1.59 CI 1.27 to 1.99) and liver (1.82 CI 1.59 to 2.09), 10% for mortality from cancer (HR 1.10 CI 1.06 to 1.15), 20% for respiratory causes (HR 1.20 CI 1.07 to 1.34) and 20% to other causes of mortality (1.20 CI 1.16 to 1.25)[3].

A recent study estimated the population attributable fraction of physical inactivity. Life tables were used to estimate the gain in life expectancy of the population. Globally, it was estimated that physical inactivity causes 6% (range 3.2% in East Asia to 7.8% in Eastern Mediterranean) of the burden of disease related to coronary heart disease, 7% (3.9–9.6%) of T2DM, 10% (5.6 to 14.1) of breast cancer and 10% (5.7 to 13.8) of colon cancer. It was estimated that avoiding physical inactivity could increase the world's population life expectancy in 0.68 years (range 0.41 to 0.95)[4].

## Biological basis

Over the past decade, several data showed the role of regular exercise in the prevention of T2DM, as well as its beneficial effects on glycemic homeostasis [17]. Recent evidence showed a reduced exercise capacity in patients with T2DM compared with non-diabetic individuals [18]. This phenomenon can be explained because insulin stimulates the muscle's glucose uptake, which is responsible for disposing 80% to 90% of the consumed glucose load[19]. The resultant hyperglycaemia presents a stimulus to the beta cells, which secretes large amounts of insulin after meals, and it's directly involved in the generation of insulin resistance and diabetes[20]. From a biochemical standpoint, evidence has shown that intramuscular nonoptimal lipid metabolism provide the substrate to metabolite formation associated with the development of insulin resistance through different pathways[21]. In this context, it has been proposed that sedentarism is associated with mitochondrial dysfunction in the skeletal muscle [22].

Several evidence showed an association between smoking and insulin resistance[23,24], the sub clinical condition prior to the development of T2DM [25]. In 1992 Facchini et al.[26], studied the effects of smoking over glycemic homeostasis, comparing the response of 20 healthy individuals (mean age of 39 years old) with a smoker group. The smoker group had significant higher insulinaemia. After that, Attval et al.[27], compared the peripheral insulin sensibility when smoking, finding that peripheral glucose uptake decreases.

The increase in Insulinaemia would be mediated mainly by the ability of nicotine to induce a chronic increment of insulin antagonist in plasma, such as catecholamines, cortisol and growth hormone (GH)[28–32]. An increase of catecholamines reduces the peripheral sensitivity to insulin [33,34] and the secretion of this hormone[35]. Chronic plasmatic cortisol elevation has been associated with insulin resistance, independently of obesity[36] through a mechanism that would impair  $\beta$ -pancreatic function and peripheral tissue insulin sensitivity [37]. Growth hormone increase induces insulin resistance through altered hepatic metabolism, decreasing peripheral recruitment of glucose and  $\beta$ -pancreatic effects[38].

Several epidemiological studies indicate that central obesity is an important risk factor for T2DM[39]. Adipose tissue is an active secretory organ whose secretion profile drastically changes with overweight and obesity, increasing the circulating concentrations of adipokines like leptin, or resistin [21]. Furthermore, adipose tissue macrophages starts to secrete inflammatory cytokines such as TNF  $\alpha$ [40]. An increase in circulating levels of these adipocyte- and



macrophage-derived factors in obesity leads to a chronic low-grade inflammatory state that has been linked to the development of insulin resistance and T2DM[22].

On the other hand, Obesity-related accumulation of ectopic fat in key insulin-sensitive organs (e.g., skeletal muscle and viscera) causes changes in the insulin-signaling pathways[41]. Liver steatosis is an important trigger of insulin resistance and pre-diabetes, suggesting that accumulation of intrahepatic fat is more harmful than the accumulation of ectopic fat elsewhere in the body[42]. A study[43] reported that accumulation of liver fat might affect  $\beta$ -cell compensation for insulin resistance.

Despite that epidemiological data found that alcohol consumption reduces the incidence of T2DM, literature also suggest that binge drinking seems to increase the incidence of this disease[44]. However, these findings seems not to be applicable to some populations in Asia, where available data suggest that alcohol intake may be a risk factor for T2DM mellitus for Japanese[45]. Chronic ethanol consumption may produce steatohepatitis [46], promoting the development of T2DM through a liver dependent pathway.

## Study limitations

A group of people did not accept to provide blood samples, which were necessary to detect T2DM patients without self-report, according to the study definitions: therefore, it's possible that T2DM prevalence has been underestimated.

Finally, as in all cross-sectional study, it's not possible to affirm a causal association between T2DM and the researched risk factors because all of them were measured at the same time. However, our findings could help estimate at a population level the impact of public health policies to prevent T2DM. In Chile's case, where NCDs and their risk factors are on the rise and a high impact of these risk factors have been observed on diabetes, it's urgent to implement interventions to tackle them.

## Author Contributions

**Conceptualization:** ME.

**Data curation:** ME MPB.

**Formal analysis:** ME MPB.

**Investigation:** ME MPB.

**Methodology:** ME MPB.

**Project administration:** ME.

**Resources:** ME MPB.

**Software:** ME MPB.

**Supervision:** ME.

**Validation:** ME MPB.

**Visualization:** ME MPB.

**Writing – original draft:** ME MPB JGG ML DS AG.

**Writing – review & editing:** ME MPB JGG ML DS AG AS MW.



## References

1. World Health Organization. Global status report on noncommunicable diseases 2010 [Internet]. 2011. Disponible en: [www.who.int/nmh/publications/ncd\\_report\\_full\\_en.pdf](http://www.who.int/nmh/publications/ncd_report_full_en.pdf)
2. Danaei G, Finucane MM, Lu Y, Singh GM, Cowan MJ, Paciorek CJ, et al. National, regional, and global trends in fasting plasma glucose and diabetes prevalence since 1980: systematic analysis of health examination surveys and epidemiological studies with 370 country-years and 2.7 million participants. *Lancet*. 2 de julio de 2011; 378(9785):31–40. [https://doi.org/10.1016/S0140-6736\(11\)60679-X](https://doi.org/10.1016/S0140-6736(11)60679-X) PMID: 21705069
3. Prospective Studies Collaboration. Body-mass index and cause-specific mortality in 900 000 adults: collaborative analyses of 57 prospective studies. *Lancet*. 28 de marzo de 2009; 373(9669):1083–96. [https://doi.org/10.1016/S0140-6736\(09\)60318-4](https://doi.org/10.1016/S0140-6736(09)60318-4) PMID: 19299006
4. Lee I-M, Shiroma EJ, Lobelo F, Puska P, Blair SN, Katzmarzyk PT. Effect of physical inactivity on major non-communicable diseases worldwide: an analysis of burden of disease and life expectancy. *Lancet*. 21 de julio de 2012; 380(9838):219–29. [https://doi.org/10.1016/S0140-6736\(12\)61031-9](https://doi.org/10.1016/S0140-6736(12)61031-9) PMID: 22818936
5. Baliunas DO, Taylor BJ, Irving H, Roerecke M, Patra J, Mohapatra S, et al. Alcohol as a risk factor for type 2 diabetes: A systematic review and meta-analysis. *Diabetes Care*. noviembre de 2009; 32(11):2123–32. <https://doi.org/10.2337/dc09-0227> PMID: 19875607
6. Willi C, Bodenmann P, Ghali WA, Faris PD, Cornuz J. Active smoking and the risk of type 2 diabetes: a systematic review and meta-analysis. *JAMA*. 12 de diciembre de 2007; 298(22):2654–64. <https://doi.org/10.1001/jama.298.22.2654> PMID: 18073361
7. Department of Health & Human Services. The Health Consequences of Smoking—50 Years of Progress: A Report of the Surgeon General, 2014 [Internet]. 2014. <http://www.surgeongeneral.gov/library/reports/50-years-of-progress/index.html>
8. International Diabetes Federation. International Diabetes Federation Atlas [Internet]. 2014. <http://www.idf.org/diabetesatlas>
9. Ministerio de Salud, Chile. Resultados I Encuesta de Salud, Chile 2003 [Internet]. 2003. Disponible en: [epi.minsal.cl/Epi/Html/Invest/ENS/InformeFinalENS.pdf](http://epi.minsal.cl/Epi/Html/Invest/ENS/InformeFinalENS.pdf)
10. Ministerio de Salud, Chile, Pontificia Universidad Católica de Chile, Universidad Alberto Hurtado. Encuesta Nacional de Salud 2009–2010 [Internet]. 2009. <http://web.minsal.cl/portal/url/item/bcb03d7bc28b64dfe040010165012d23.pdf>
11. Orpinas P, Valdés M, Pemjeam A, Florenzano R, Nogueira R, Hernández J. Validación de una escala breve para la detección de beber anormal (EBBA). *Temas Salud Ment Aten Primaria Salud*. 1991;185–93.
12. Beverly Levine. What does the population attributable fraction mean? *Prev Chronic Dis* [Internet]. enero de 2007;[serial online]. [https://www.cdc.gov/pcd/issues/2007/jan/06\\_0091.htm](https://www.cdc.gov/pcd/issues/2007/jan/06_0091.htm)
13. Levin ML. The occurrence of lung cancer in man. *Acta Unio Int Contra Cancrum*. 1953; 9(3):531–41. PMID: 13124110
14. Llorca J., Fariñas-Álvarez C., Delgado-Rodríguez M.. Fracción atribuible poblacional: cálculo e interpretación. *Gac Sanit*. 2001; 15(1):61–7.
15. Gefeller Olaf. Theory and application of attributable risk estimation in cross-sectional studies. *Stat Appl*. 1990; 2(4):323–31.
16. StataCorp. *Stata Statistical Software*. StataCorp; 2013.
17. Duclos M, Oppert JM, Verges B, Coliche V, Gautier JF, Guezennec Y, et al. Physical activity and type 2 diabetes. Recommendations of the SFD (Francophone Diabetes Society) diabetes and physical activity working group. *Diabetes Metab*. mayo de 2013; 39(3):205–16. <https://doi.org/10.1016/j.diabet.2013.03.005> PMID: 23643351
18. Byrkjeland R, Edvardsen E, Njerve IU, Arnesen H, Seljeflot I, Solheim S. Insulin levels and HOMA index are associated with exercise capacity in patients with type 2 diabetes and coronary artery disease. *Diabetol Metab Syndr*. 10 de marzo de 2014; 6(1):36. <https://doi.org/10.1186/1758-5996-6-36> PMID: 24612649
19. Davì G, Falco A, Patrono C. Lipid peroxidation in diabetes mellitus. *Antioxid Redox Signal*. febrero de 2005; 7(1–2):256–68. <https://doi.org/10.1089/ars.2005.7.256> PMID: 15650413
20. Hattori Y, Suzuki M, Hattori S, Kasai K. Vascular smooth muscle cell activation by glycated albumin (Amadori adducts). *Hypertension*. JJan de 2002; 39(1):22–8. PMID: 11799073
21. Eckardt K, Taube A, Eckel J. Obesity-associated insulin resistance in skeletal muscle: role of lipid accumulation and physical inactivity. *Rev Endocr Metab Disord*. septiembre de 2011; 12(3):163–72. <https://doi.org/10.1007/s11154-011-9168-2> PMID: 21336841

22. Turner N, Cooney GJ, Kraegen EW, Bruce CR. Fatty acid metabolism, energy expenditure and insulin resistance in muscle. *J Endocrinol.* 15 de enero de 2014; 220(2):T61–79. <https://doi.org/10.1530/JOE-13-0397> PMID: 24323910
23. Eliasson B, Mero N, Taskinen MR, Smith U. The insulin resistance syndrome and postprandial lipid intolerance in smokers. *Atherosclerosis.* 28 de febrero de 1997; 129(1):79–88. PMID: 9069521
24. Eliasson B, Attvall S, Taskinen MR, Smith U. Smoking cessation improves insulin sensitivity in healthy middle-aged men. *Eur J Clin Invest [Internet].* mayo de 1997; 27(5). Disponible en: <http://www.ncbi.nlm.nih.gov/pubmed/9179554>
25. Soumaya K. Molecular mechanisms of insulin resistance in diabetes. *Adv Exp Med Biol.* 2012; 771:240–51. PMID: 23393683
26. Facchini F.S., Hollenbeck C.B., Jeppesen J., Ida Chen Y.-D., Reaven G.M.. Insulin resistance and cigarette smoking. *The Lancet.* 9 de mayo de 1992; 339(8802):1128–30.
27. Attvall S, Fowelin J, Lager I, Von Schenck H, Smith U. Smoking induces insulin resistance—a potential link with the insulin resistance syndrome. *J Intern Med.* abril de 1993; 233(4):327–32. PMID: 8463765
28. Cryer PE, Haymond MW, Santiago JV, Shah SD. Norepinephrine and epinephrine release and adrenergic mediation of smoking-associated hemodynamic and metabolic events. *N Engl J Med.* 9 de septiembre de 1976; 295(11):573–7. <https://doi.org/10.1056/NEJM197609092951101> PMID: 950972
29. Møller N, Jørgensen JO. Effects of growth hormone on glucose, lipid, and protein metabolism in human subjects. *Endocr Rev.* abril de 2009; 30(2):152–77. <https://doi.org/10.1210/er.2008-0027> PMID: 19240267
30. Kershbaum A, Bellet S. Smoking as a factor in atherosclerosis. A review of epidemiological, pathological, and experimental studies. *Geriatrics.* diciembre de 1966; 21(12):155–70. PMID: 5333109
31. Kirschbaum C, Wüst S, Strasburger CJ. “Normal” cigarette smoking increases free cortisol in habitual smokers. *Life Sci.* 1992; 50(6):435–42. PMID: 1734161
32. Morgan TM, Crawford L, Stoller A, Toth D, Yeo KT, Baron JA. Acute effects of nicotine on serum glucose insulin growth hormone and cortisol in healthy smokers. *Metabolism.* mayo de 2004; 53(5):578–82. PMID: 15131760
33. Barth E, Albuszies G, Baumgart K, Matejovic M, Wachter U, Vogt J, et al. Glucose metabolism and catecholamines. *Crit Care Med.* septiembre de 2007; 35(9):S508–18.
34. Günther T. The biochemical function of Mg<sup>2+</sup> in insulin secretion, insulin signal transduction and insulin resistance. *Magnes Res.* marzo de 2010; 23(1):5–18. <https://doi.org/10.1684/mrh.2009.0195> PMID: 20228013
35. Straub SG, Sharp GWG. Evolving insights regarding mechanisms for the inhibition of insulin release by norepinephrine and heterotrimeric G proteins. *Am J Physiol Cell Physiol.* 15 de junio de 2012; 302(12):C1687–98. <https://doi.org/10.1152/ajpcell.00282.2011> PMID: 22492651
36. Mancini T, Kola B, Mantero F, Boscaro M, Arnaldi G. High cardiovascular risk in patients with Cushing’s syndrome according to 1999 WHO/ISH guidelines. *Clin Endocrinol Oxf.* diciembre de 2004; 61(6):168–77.
37. Di Dalmazi Guido, Pagotto Uberto, Pasquali Renato, Vicennati Valentina. Glucocorticoids and Type 2 Diabetes: From Physiology to Pathology. *J Nutr Metab [Internet].* 2012. Disponible en: <http://www.hindawi.com/journals/jnme/2012/525093/>
38. Shao S, Yang Y, Yuan G, Zhang M, Yu X. Signaling molecules involved in lipid-induced pancreatic beta-cell dysfunction. *DNA Cell Biol.* febrero de 2013; 32(2):41–9. <https://doi.org/10.1089/dna.2012.1874> PMID: 23347443
39. Hu Frank B. *Obesity Epidemiology.* Oxf Univ Press. 2008; 512.
40. Ye J. Mechanisms of insulin resistance in obesity. *Front Med.* marzo de 2013; 7(1):14–24. <https://doi.org/10.1007/s11684-013-0262-6> PMID: 23471659
41. Tuomi Tiinamaija, Santoro Nicola, Caprio Sonia, Cai Mengyin, Weng Jianping, Groop Leif. The many faces of diabetes: a disease with increasing heterogeneity. *The Lancet.* marzo de 2014; 383(9922):1084–94.
42. Taksali SE, Caprio S, Dziura J, Dufour S, Cali AM, Goodman TR, et al. High visceral and low abdominal subcutaneous fat stores in the obese adolescent: a determinant of an adverse metabolic phenotype. *Diabetes.* febrero de 2008; 57(2):367–71. <https://doi.org/10.2337/db07-0932> PMID: 17977954
43. Alderete TL, Toledo-Corral CM, Desai P, Weigensberg MJ, Goran MI. Liver fat has a stronger association with risk factors for type 2 diabetes in African-American compared with Hispanic adolescents. *J Clin Endocrinol Metab.* septiembre de 2013; 98(9):3748–54. <https://doi.org/10.1210/jc.2013-1138> PMID: 23873990

44. Pietraszek A, Gregersen S, Hermansen K. Alcohol and type 2 diabetes. A review. *Nutr Metab Cardiovasc Dis.* junio de 2010; 20(5):366–75. <https://doi.org/10.1016/j.numecd.2010.05.001> PMID: [20556883](#)
45. Seike N, Noda M, Kadowaki T. Alcohol consumption and risk of type 2 diabetes mellitus in Japanese: a systematic review. *Asia Pac J Clin Nutr.* 2008; 17(4):545–51. PMID: [19114388](#)
46. He J, de la Monte S, Wands JR. Acute ethanol exposure inhibits insulin signaling in the liver. *Hepatology.* diciembre de 2007; 46(6):1791–800. <https://doi.org/10.1002/hep.21904> PMID: [18027876](#)
